# Supplementary material for: Infections increase the risk of decompensation and death in patients with early alcohol-related liver disease
Source: PubMed Central journal article supplement — JHEP Rep. 2024 Jan 24;6(4):101016. doi: 10.1016/j.jhepr.2024.101016 (PMC10937840; doi:10.1016/j.jhepr.2024.101016), 2024-01-24
Supplement: mmc1.pdf [file mmc1.pdf]

# **Infections increase the risk of decompensation and death in patients with early alcohol-related liver disease**

Stine Johansen, Simon Langkjær, Ditlev Nytoft Rasmussen, Mads Israelsen, Nikolaj Torp, Katrine Lindvig, Maria Kjærgaard, Johanne Kragh Hansen, Camilla Dalby Hansen, Katrine Thorhauge, Peter Andersen, Sönke Detlefsen, Helene Bæk Juel, Ulrik Stenz Justesen, Torben Hansen, Aleksander Krag, Maja Thiele on behalf of the GALAXY and MicrobLiver consortia

## Table of contents

|                       |   |
|-----------------------|---|
| Table S1.....         | 2 |
| Table S2.....         | 2 |
| Table S3.....         | 3 |
| Table S4.....         | 4 |
| Table S5.....         | 5 |
| Table S6.....         | 6 |
| STROBE Checklist..... | 7 |

**Table S1.** Independent prognostic factors associated with death.

|                        | Multivariable analysis<br>aHR (95% CI) | p      |
|------------------------|----------------------------------------|--------|
| Infection, yes         | 5.57 (3.03-10.23)                      | <0.001 |
| Age                    | 1.00 (0.98-1.03)                       | 0.720  |
| Gender                 | 0.98 (0.55-1.77)                       | 0.953  |
| Kleiner fibrosis stage | 1.40 (1.09-1.78)                       | 0.008  |
| MELD score             | 1.06 (0.94-1.21)                       | 0.323  |

**Table S2.** 30-day mortality rates for infections according to baseline fibrosis stage and infection site.

| Site of infection         | Fibrosis stage F0-2*<br>(n = 366) |                  | Fibrosis stage F3-4*<br>(n = 93) |                  |
|---------------------------|-----------------------------------|------------------|----------------------------------|------------------|
|                           | Infections                        | 30-day mortality | Infections                       | 30-day mortality |
| All infections, n         | 182                               | 20 (11%)         | 125                              | 14 (11%)         |
| Pulmonary, n              | 70 (38%)                          | 12 (17%)         | 33 (26%)                         | 5 (15%)          |
| Urinary tract, n          | 29 (16%)                          | 2 (7%)           | 28 (22%)                         | 2 (7%)           |
| Skin, n                   | 23 (13%)                          | 1 (4%)           | 4 (3%)                           | 0                |
| Sepsis, n                 | 14 (8%)                           | 3 (21%)          | 11 (9%)                          | 4 (36%)          |
| Gastrointestinal tract, n | 11 (6%)                           | 0                | 11 (9%)                          | 1 (9%)           |
| SBP, n                    | 2 (1%)                            | 1 (9%)           | 9 (7%)                           | 2 (22%)          |
| Other, n                  | 24 (17%)                          | 0                | 21 (17%)                         | 0                |
| Unknown, n                | 9 (1%)                            | 1 (11%)          | 8 (6%)                           | 0                |

**Table S3.** Independent prognostic factors associated with decompensation.

|                        | Multivariable analysis<br>aHR (95% CI) | p      |
|------------------------|----------------------------------------|--------|
| Infection, yes         | 2.60 (1.18-5.73)                       | 0.018  |
| Age                    | 0.98 (0.95-1.01)                       | 0.234  |
| Gender                 | 0.90 (0.47-1.74)                       | 0.762  |
| Kleiner fibrosis stage | 2.52 (1.91-3.34)                       | <0.001 |
| MELD score             | 1.11 (0.95-1.30)                       | 0.179  |

**Table S4.** Factors associated with developing severe infections assessed by univariable and multivariable competing risk regression analysis.

|                                         | Univariate analysis     |                  | Multivariate analysis   |              |
|-----------------------------------------|-------------------------|------------------|-------------------------|--------------|
|                                         | sHR (95% CI)            | p-value          | sHR (95% CI)            | p-value      |
| Age ≥50, yes                            | 1.23 (0.74-2.04)        | 0.419            | 0.87 (0.47-1.62)        | 0.669        |
| Gender, male                            | 1.00 (0.62-1.60)        | 0.992            | 1.10 (0.67-1.80)        | 0.711        |
| Alcohol overuse at baseline, yes        | 1.52 (0.98-2.35)        | 0.061            | 1.11 (0.66-1.84)        | 0.701        |
| Alcohol overuse during follow-up, yes   | <b>2.21 (1.31-3.71)</b> | <b>0.003</b>     | <b>2.24 (1.19-4.21)</b> | <b>0.012</b> |
| Smoking ≥ 30 pack years                 | <b>1.87 (1.20-2.91)</b> | <b>0.005</b>     | <b>1.87 (1.11-3.16)</b> | <b>0.019</b> |
| BMI≥30, yes                             | 0.65 (0.39-1.07)        | 0.089            | 0.58 (0.29-1.16)        | 0.126        |
| Type 2 diabetes                         | <b>1.81 (1.02-3.22)</b> | <b>0.042</b>     | 1.30 (0.57-2.96)        | 0.526        |
| HOMA-IR≥2.5, yes                        | 1.03 (0.68-1.56)        | 0.894            | 0.65 (0.39-1.08)        | 0.096        |
| Leukocytes ≥ 8.8                        | 1.31 (0.85-2.00)        | 0.218            | 1.36 (0.82-2.23)        | 0.233        |
| CRP ≥ 6                                 | 1.21 (0.79-1.87)        | 0.381            | 0.99 (0.60-1.63)        | 0.977        |
| MELD score ≥ 9                          | <b>2.68 (1.52-4.73)</b> | <b>0.001</b>     | 1.51 (0.74-3.06)        | 0.259        |
| Transient elastography                  |                         |                  |                         |              |
| ≤10 kPa                                 | 1                       | -                | 1                       | -            |
| >10 - ≤15 kPa                           | <b>3.61 (1.89-6.93)</b> | <b>&lt;0.001</b> | <b>2.29 (1.02-5.10)</b> | <b>0.044</b> |
| >15 kPa                                 | <b>4.77 (2.96-7.69)</b> | <b>&lt;0.001</b> | <b>2.84 (1.13-7.12)</b> | <b>0.026</b> |
| TE at follow-up                         | 1                       | -                | 1                       | -            |
| ≤10 kPa                                 | <b>3.50 (1.75-7.00)</b> | <b>&lt;0.001</b> | 1.89 (0.80-4.49)        | 0.148        |
| >10 - ≤15 kPa                           | <b>4.35 (2.78-6.79)</b> | <b>&lt;0.001</b> | 1.75 (0.74-4.13)        | 0.201        |
| >15 kPa                                 |                         |                  |                         |              |
| Progression of TE during follow-up, yes | 1.20 (0.75-1.92)        | 0.441            | 1.11 (0.61-2.01)        | 0.740        |

**Table S5.** Characteristics of patients with fibrosis stage F0-2 at baseline.

| <b>Fibrosis stage F0-2 (n = 366)</b>                                     |                               |                           |
|--------------------------------------------------------------------------|-------------------------------|---------------------------|
|                                                                          | <b>No infection</b><br>N= 285 | <b>Infection</b><br>N= 81 |
| Patients with repeated TE during FU                                      | 217                           | 81                        |
| Baseline TE (kPa)                                                        | 5.5 (4.4-7.9)                 | 6.8 (5.2-10.4)            |
| • ≥10 kPa                                                                | 33 (12%)                      | 23 (28%)                  |
| • ≥15 kPa                                                                | 14 (5%)                       | 7 (9%)                    |
| Repeated TE (kPa)                                                        | 5.3 (4.2-7.1)                 | 6.5 (5.1-10.0)            |
| • ≥10 kPa                                                                | 18 (%)                        | 12 (%)                    |
| • ≥15 kPa                                                                | 20 (%)                        | 13 (%)                    |
| Months between TE at baseline and follow up                              | 37 (14-58)                    | 43 (13-68)                |
| <b>Events during follow-up</b>                                           |                               |                           |
| Decompensation                                                           | 11 (4%)                       | 7 (9%)                    |
| Death                                                                    | 13 (5%)                       | 23 (28%)                  |
| <b>Alcohol history</b>                                                   |                               |                           |
| Abstinent at inclusion                                                   | 115 (40%)                     | 31 (38%)                  |
| Duration of excess drinking (years)                                      | 16 (8-26)                     | 16 (8-26)                 |
| Drinks in the week leading up to inclusion, for ongoing drinkers (units) | 21 (8-30)                     | 15 (7-35)                 |
| Evidence of excessive alcohol intake during follow-up                    | 138 (48%)                     | 64 (79%)                  |
| Summary data reported as median with IQR or counts with proportions.     |                               |                           |

**Table S6.** Characteristics of infections stratified by baseline fibrosis stage.

|                                  | Fibrosis stage F0-2*<br>(n = 366) | Fibrosis stage F3-4*<br>(n = 93) |
|----------------------------------|-----------------------------------|----------------------------------|
| All infections                   | 182                               | 125                              |
| Severe infections                | 99 (54%)                          | 82 (66%)                         |
| Patients with min. 1 infection   | 81 (22%)                          | 51 (55%)                         |
| Site of infection                |                                   |                                  |
| Pulmonary, n                     | 70 (38%)                          | 33 (26%)                         |
| Urinary tract, n                 | 29 (16%)                          | 28 (22%)                         |
| Skin, n                          | 23 (13%)                          | 4 (3%)                           |
| Sepsis, n                        | 14 (8%)                           | 11 (9%)                          |
| Gastrointestinal tract, n        | 11 (6%)                           | 11 (9%)                          |
| SBP, n                           | 2 (1%)                            | 9 (7%)                           |
| Other, n                         | 24 (17%)                          | 21 (17%)                         |
| Unknown, n                       | 9 (1%)                            | 8 (6%)                           |
| Type of infection                |                                   |                                  |
| Bacterial                        | 62 (34%)                          | 65 (52%)                         |
| Viral                            | 7 (4%)                            | 2 (2%)                           |
| Fungal                           | 2 (1%)                            | 4 (3%)                           |
| Unknown (not cultured)           | 120 (66%)                         | 54 (43%)                         |
| Treatment                        |                                   |                                  |
| No treatment                     | 6 (3%)                            | 2 (2%)                           |
| Intravenous treatment            | 96 (53%)                          | 86 (69%)                         |
| Peroral treatment                | 79 (43%)                          | 37 (30%)                         |
| Infection when hospitalized, yes | 133 (73%)                         | 108 (86%)                        |

\* Fibrosis stage is missing in 99 patients: we refrained from a biopsy in patients with TE <6 kPa (n=97) from 2016, 1 with an inconclusive biopsy, and 1 technically not possible. The two patients with no biopsy and TE >6 kPa developed a total of five infections, which is not reported in this table.

The group 'Fibrosis stage F0-2' includes biopsied patients with fibrosis stage F0-2 and patients with transient elastography <6 kPa.

STROBE Statement - Checklist of items that should be included in reports of *cohort studies*

|                           | Item No | Recommendation                                                                                                                                                                       |                                                                             |
|---------------------------|---------|--------------------------------------------------------------------------------------------------------------------------------------------------------------------------------------|-----------------------------------------------------------------------------|
| <b>Title and abstract</b> | 1       | (a) Indicate the study's design with a commonly used term in the title or the abstract                                                                                               | Abstract p. 5                                                               |
|                           |         | (b) Provide in the abstract an informative and balanced summary of what was done and what was found                                                                                  | Abstract p. 5                                                               |
| <b>Introduction</b>       |         |                                                                                                                                                                                      |                                                                             |
| Background/rationale      | 2       | Explain the scientific background and rationale for the investigation being reported                                                                                                 | Introduction p. 8                                                           |
| Objectives                | 3       | State specific objectives, including any prespecified hypotheses                                                                                                                     | Introduction p. 8-9                                                         |
| <b>Methods</b>            |         |                                                                                                                                                                                      |                                                                             |
| Study design              | 4       | Present key elements of study design early in the paper                                                                                                                              | 'Study design' section p. 10                                                |
| Setting                   | 5       | Describe the setting, locations, and relevant dates, including periods of recruitment, exposure, follow-up, and data collection                                                      | 'Patients' section p. 10 and 'Patients and infection characteristics' p. 15 |
| Participants              | 6       | (a) Give the eligibility criteria, and the sources and methods of selection of participants. Describe methods of follow-up                                                           | 'Patients' p. 10 and 'Follow-up data' p. 11-12                              |
|                           |         | (b) For matched studies, give matching criteria and number of exposed and unexposed                                                                                                  | N/A                                                                         |
| Variables                 | 7       | Clearly define all outcomes, exposures, predictors, potential confounders, and effect modifiers. Give diagnostic criteria, if applicable                                             | 'Follow-up data' p. 11-12 and 'Infections' p. 12                            |
| Data sources/measurement  | 8*      | For each variable of interest, give sources of data and details of methods of assessment (measurement). Describe comparability of assessment methods if there is more than one group | 'Investigations' p. 10-11, 'Follow-up data' p. 11-12 and 'Infections' p. 12 |
| Bias                      | 9       | Describe any efforts to address potential sources of bias                                                                                                                            | Not reported                                                                |
| Study size                | 10      | Explain how the study size was arrived at                                                                                                                                            | All consecutive patients with an available follow-up were used.             |
| Quantitative variables    | 11      | Explain how quantitative variables were handled in the analyses. If applicable, describe which groupings were chosen and why                                                         | 'Statistical analysis' p. 13-14                                             |
| Statistical methods       | 12      | (a) Describe all statistical methods, including those used to control for confounding                                                                                                | 'Statistical analysis' p. 13-14                                             |
|                           |         | (b) Describe any methods used to examine subgroups and interactions                                                                                                                  | 'Statistical analysis' p. 13-14                                             |
|                           |         | (c) Explain how missing data were addressed                                                                                                                                          | 'Statistical analysis' p. 13-14                                             |
|                           |         | (d) If applicable, explain how loss to follow-up was addressed                                                                                                                       | 'Statistical analysis' p. 13-14                                             |
|                           |         | (e) Describe any sensitivity analyses                                                                                                                                                | 'Statistical analysis' p. 13-14                                             |

| <b>Results</b>           |     |                                                                                                                                                                                                              |                                                                                                                |
|--------------------------|-----|--------------------------------------------------------------------------------------------------------------------------------------------------------------------------------------------------------------|----------------------------------------------------------------------------------------------------------------|
| Participants             | 13* | (a) Report numbers of individuals at each stage of study—e.g. numbers potentially eligible, examined for eligibility, confirmed eligible, included in the study, completing follow-up, and analyzed          | 'Patients and infection characteristics' p. 12                                                                 |
|                          |     | (b) Give reasons for non-participation at each stage                                                                                                                                                         | N/A                                                                                                            |
|                          |     | (c) Consider use of a flow diagram                                                                                                                                                                           | Not reported                                                                                                   |
| Descriptive data         | 14* | (a) Give characteristics of study participants (e.g. demographic, clinical, social) and information on exposures and potential confounders                                                                   | 'Patients and infection characteristics' p. 15 and table 1                                                     |
|                          |     | (b) Indicate number of participants with missing data for each variable of interest                                                                                                                          | Reported when applicable in table 1, figure 3A+3B                                                              |
|                          |     | (c) Summarize follow-up time (e.g., average and total amount)                                                                                                                                                | 'Patients and infection characteristics' p. 15                                                                 |
| Outcome data             | 15* | Report numbers of outcome events or summary measures over time                                                                                                                                               | 'Patients and infection characteristics' p. 15 and table 1+2                                                   |
| Main results             | 16  | (a) Give unadjusted estimates and, if applicable, confounder-adjusted estimates and their precision (eg, 95% confidence interval). Make clear which confounders were adjusted for and why they were included | 'Predictors associated with development of infections' p. 17-18 and table 3 and supplementary table S4         |
|                          |     | (b) Report category boundaries when continuous variables were categorized                                                                                                                                    | Not reported                                                                                                   |
|                          |     | (c) If relevant, consider translating estimates of relative risk into absolute risk for a meaningful time period                                                                                             | Not reported                                                                                                   |
| Other analyses           | 17  | Report other analyses done—e.g., analyses of subgroups and interactions, and sensitivity analyses                                                                                                            | 'Predictors associated with development of infections' p. 17-18 and figure 1B+3A+3B and supplementary table S4 |
| <b>Discussion</b>        |     |                                                                                                                                                                                                              |                                                                                                                |
| Key results              | 18  | Summarize key results with reference to study objectives                                                                                                                                                     | Discussion p. 19-23                                                                                            |
| Limitations              | 19  | Discuss limitations of the study, taking into account sources of potential bias or imprecision. Discuss both direction and magnitude of any potential bias                                                   | Discussion p. 22                                                                                               |
| Interpretation           | 20  | Give a cautious overall interpretation of results considering objectives, limitations, multiplicity of analyses, results from similar studies, and other relevant evidence                                   | Discussion p. 19-23                                                                                            |
| Generalizability         | 21  | Discuss the generalizability (external validity) of the study results                                                                                                                                        | Discussion p. 19-23                                                                                            |
| <b>Other information</b> |     |                                                                                                                                                                                                              |                                                                                                                |



|         |    |                                                                                                                                                               |                 |
|---------|----|---------------------------------------------------------------------------------------------------------------------------------------------------------------|-----------------|
| Funding | 22 | Give the source of funding and the role of the funders for the present study and, if applicable, for the original study on which the present article is based | Title page p. 2 |
|---------|----|---------------------------------------------------------------------------------------------------------------------------------------------------------------|-----------------|

\*Give information separately for exposed and unexposed groups.
